# Supplementary material
Source: bioRxiv or medRxiv preprint supplement (https://www.biorxiv.org/highwire/filestream/23330/field_highwire_adjunct_files/14/083931-8.pdf)

Figure S8.1

*H. cydno*

Split reads and trio assembly

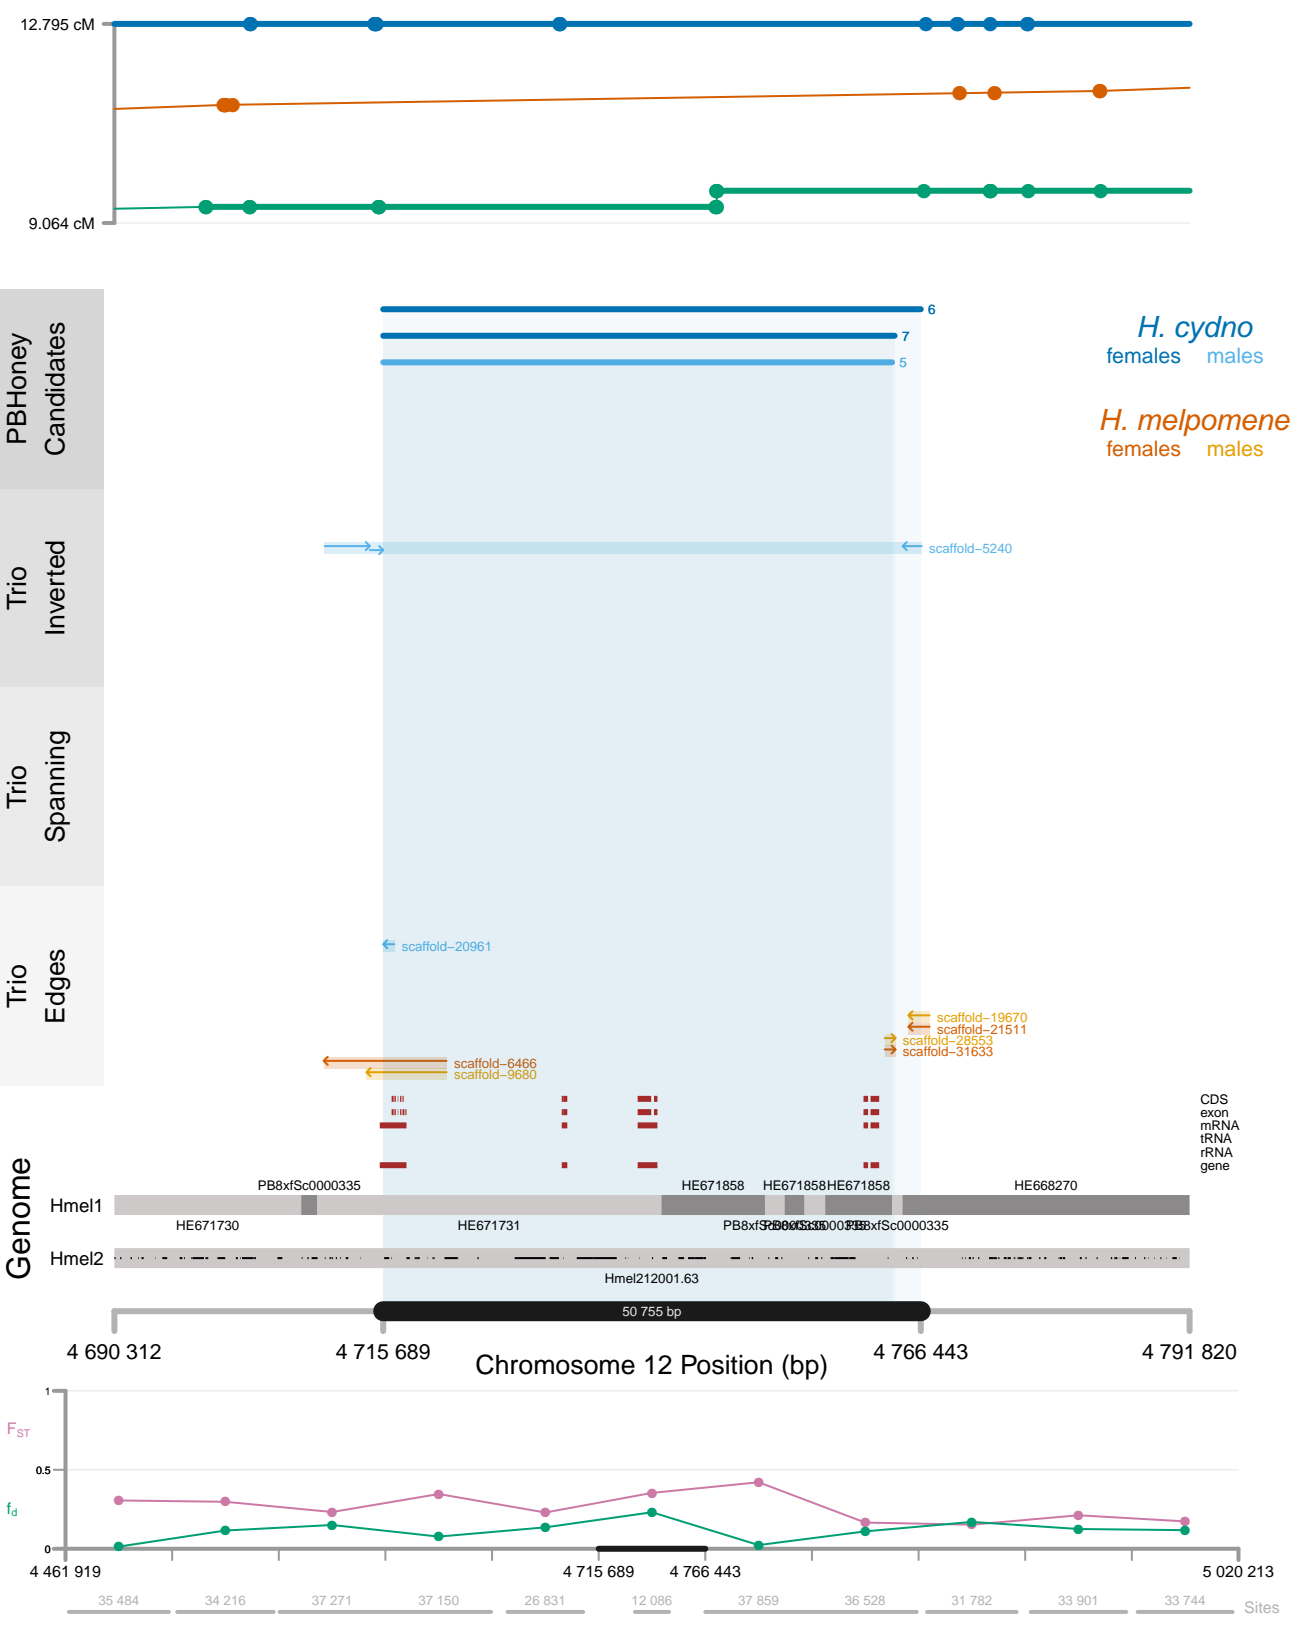

Figure S8.2

*H. cydno*

Split reads and trio assembly

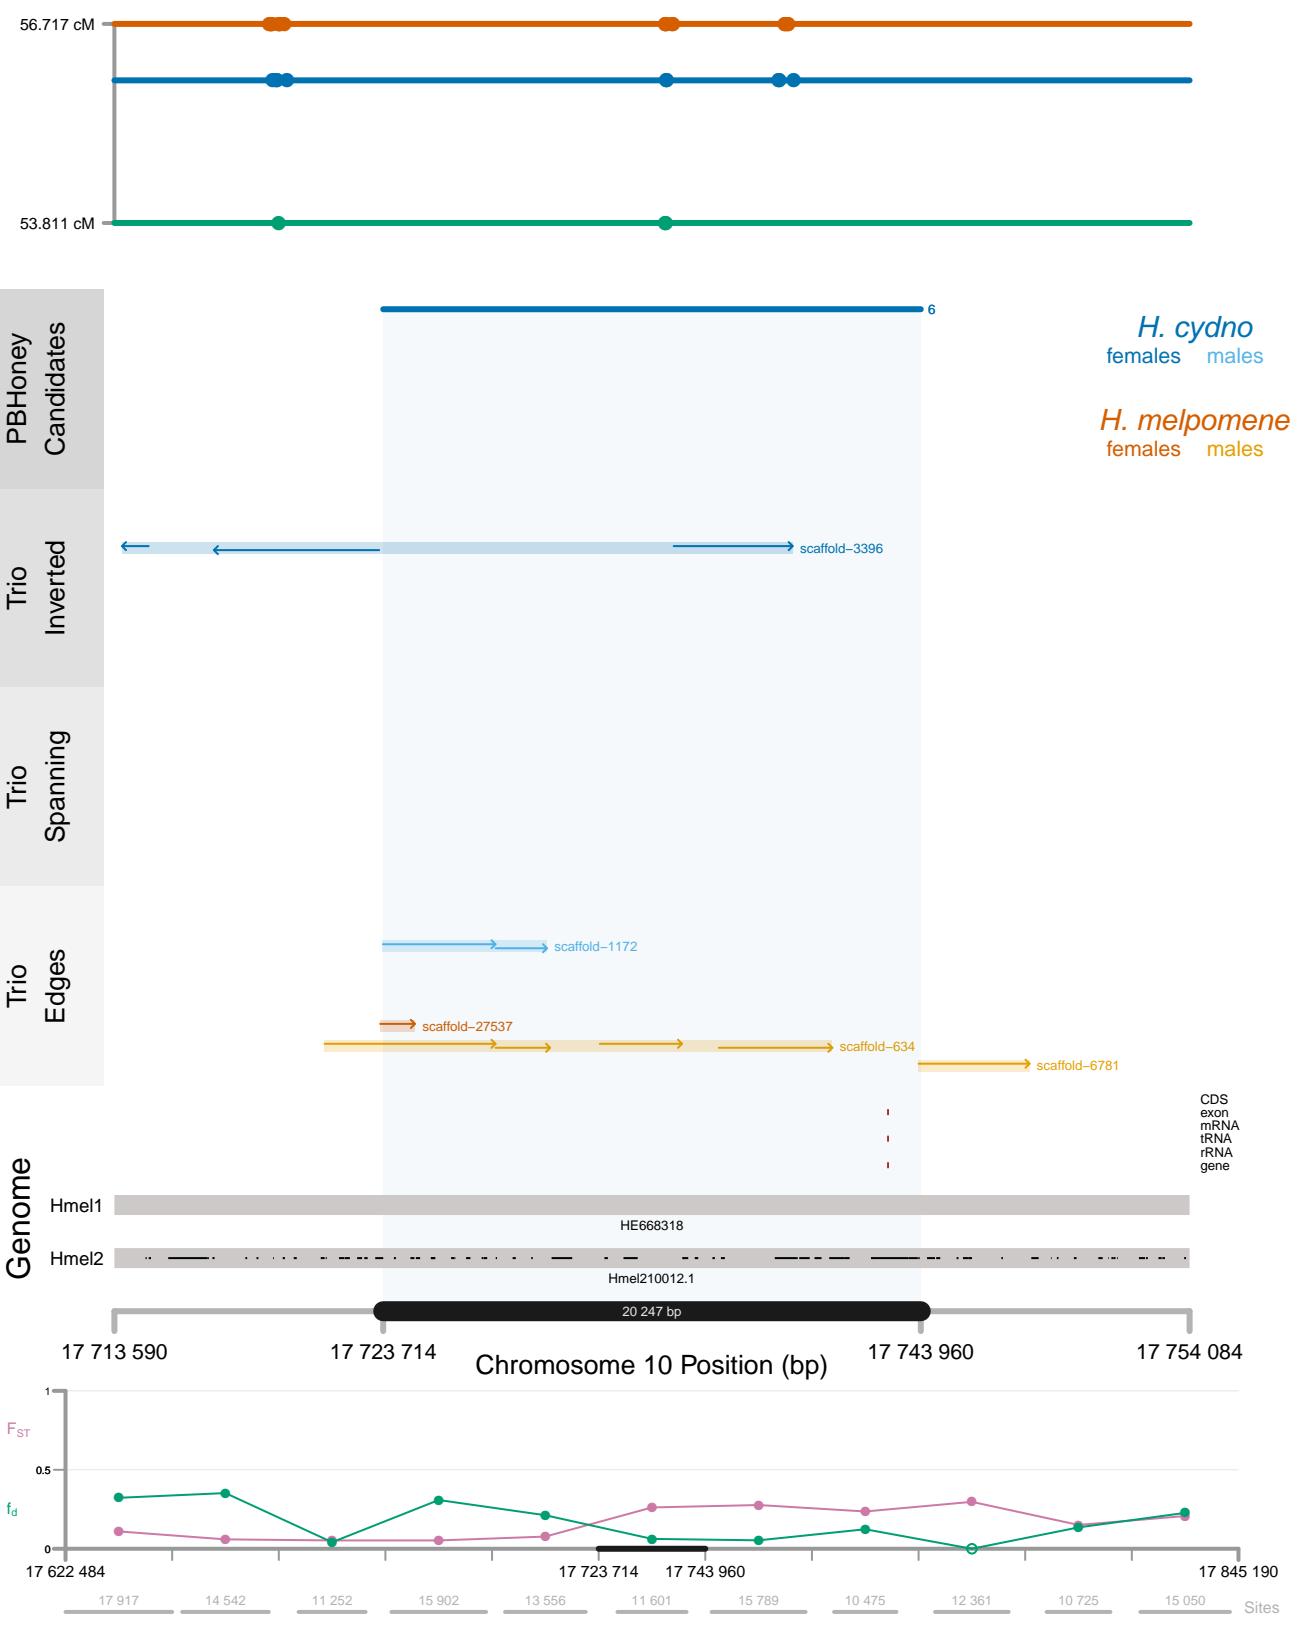

Figure S8.3

*H. cydno*

Split reads and trio assembly

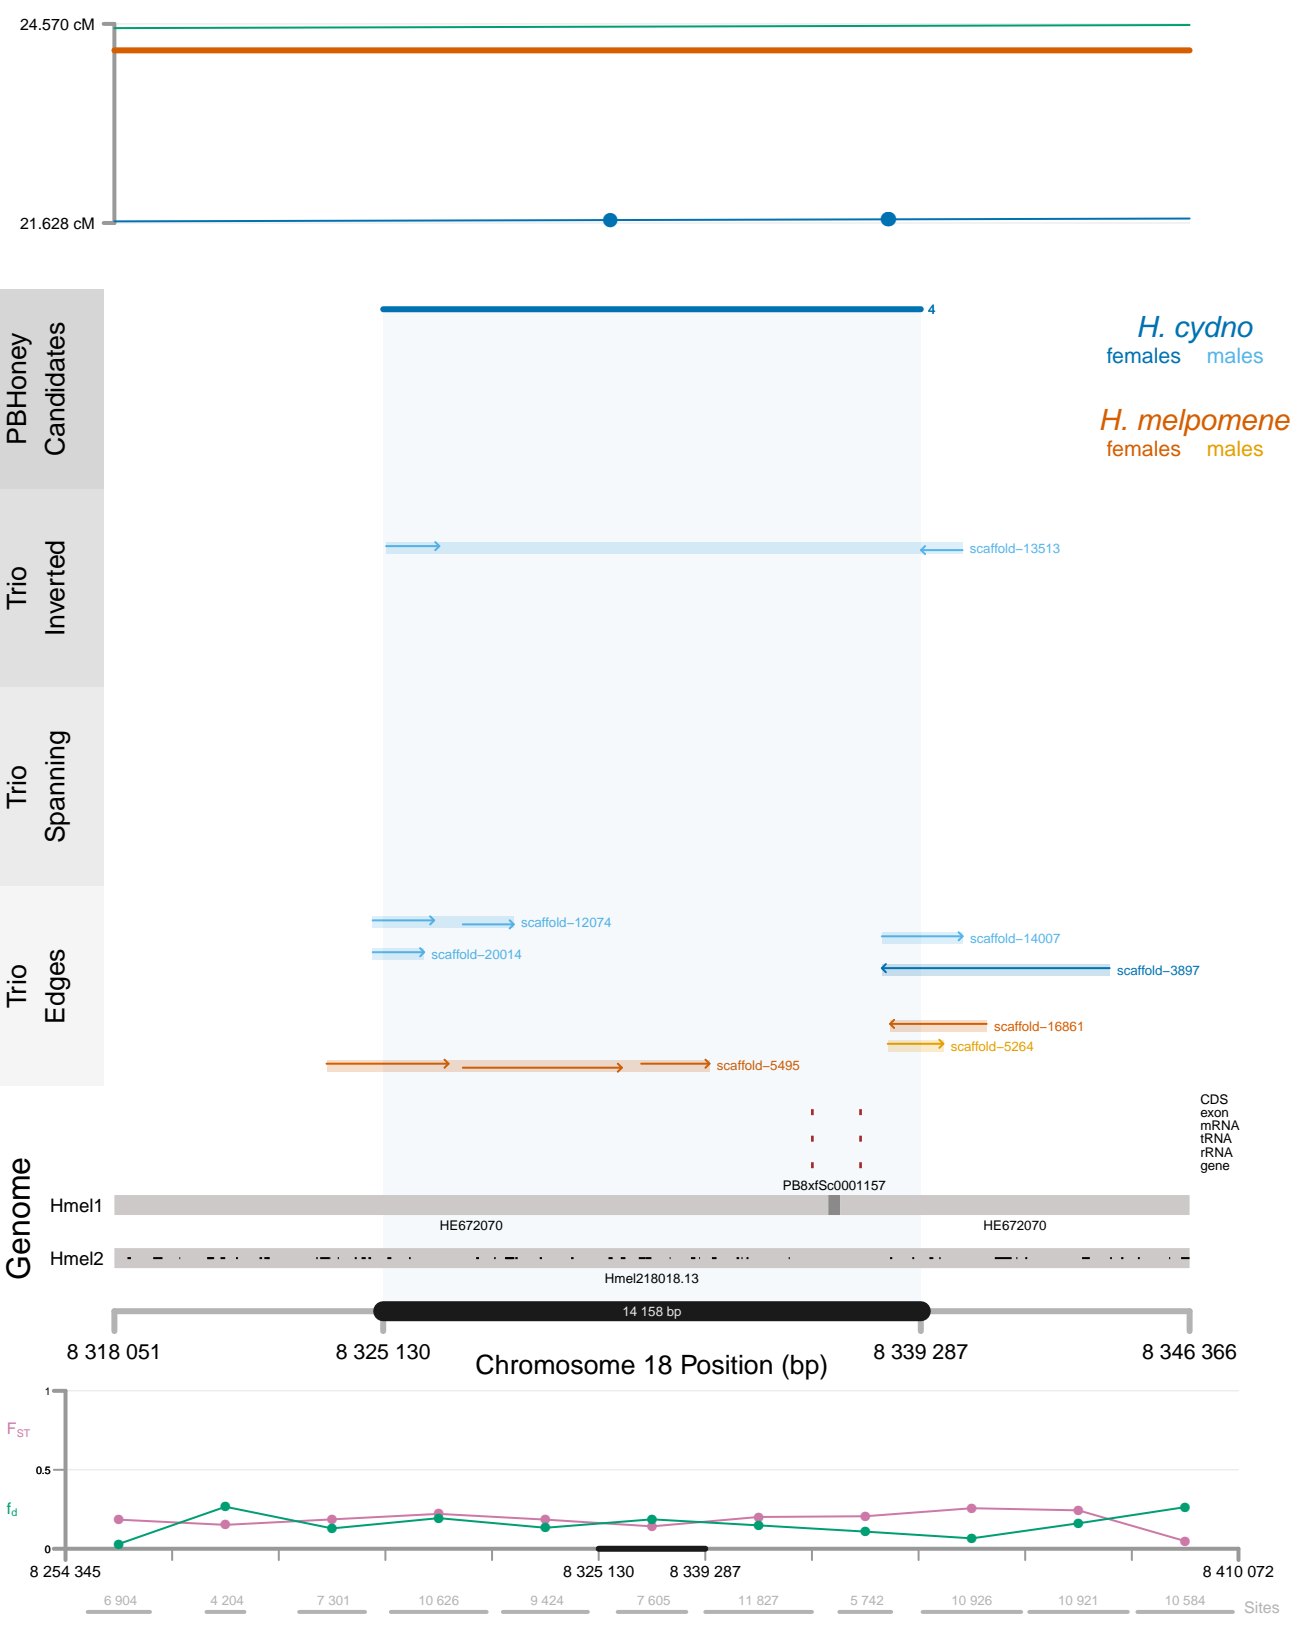

Figure S8.4

*H. cydno*

Split reads and trio assembly

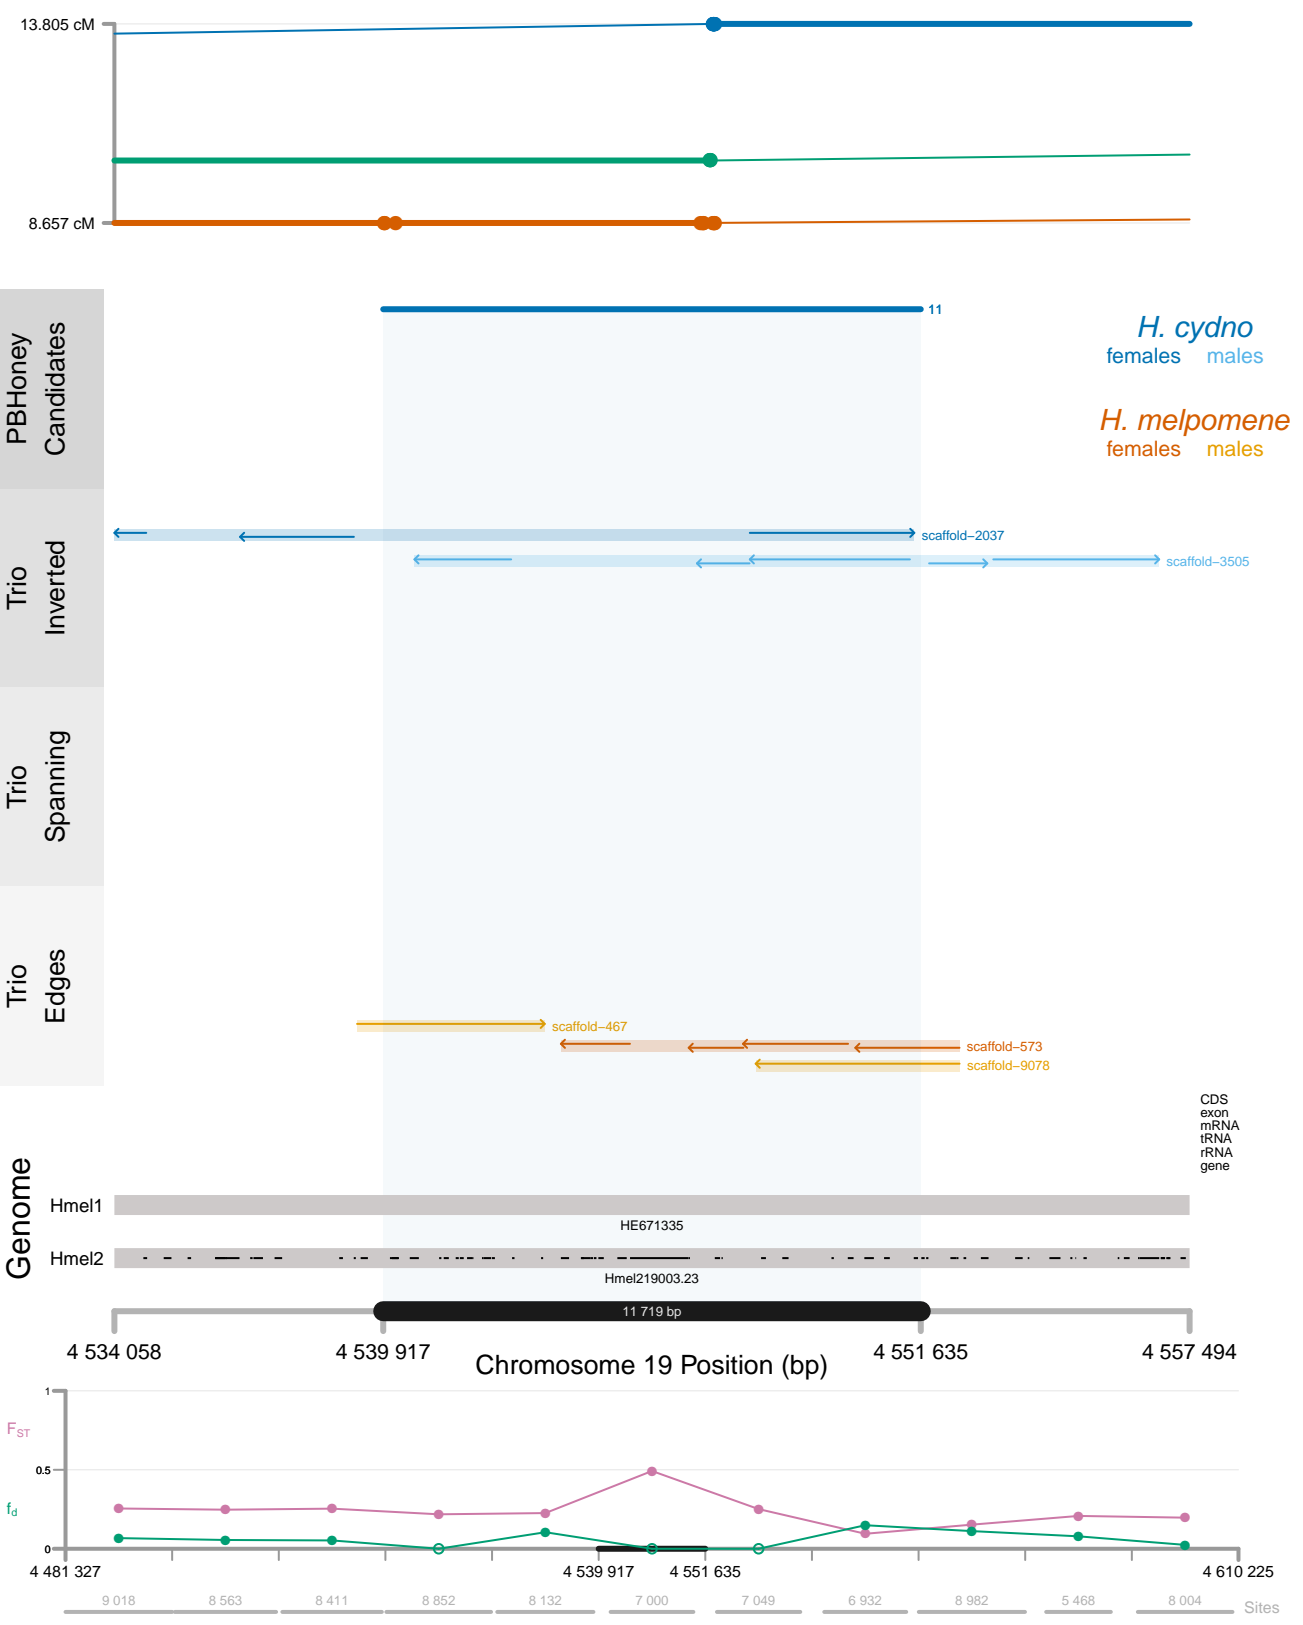

Figure S8.5

*H. cydno*

Split reads and trio assembly

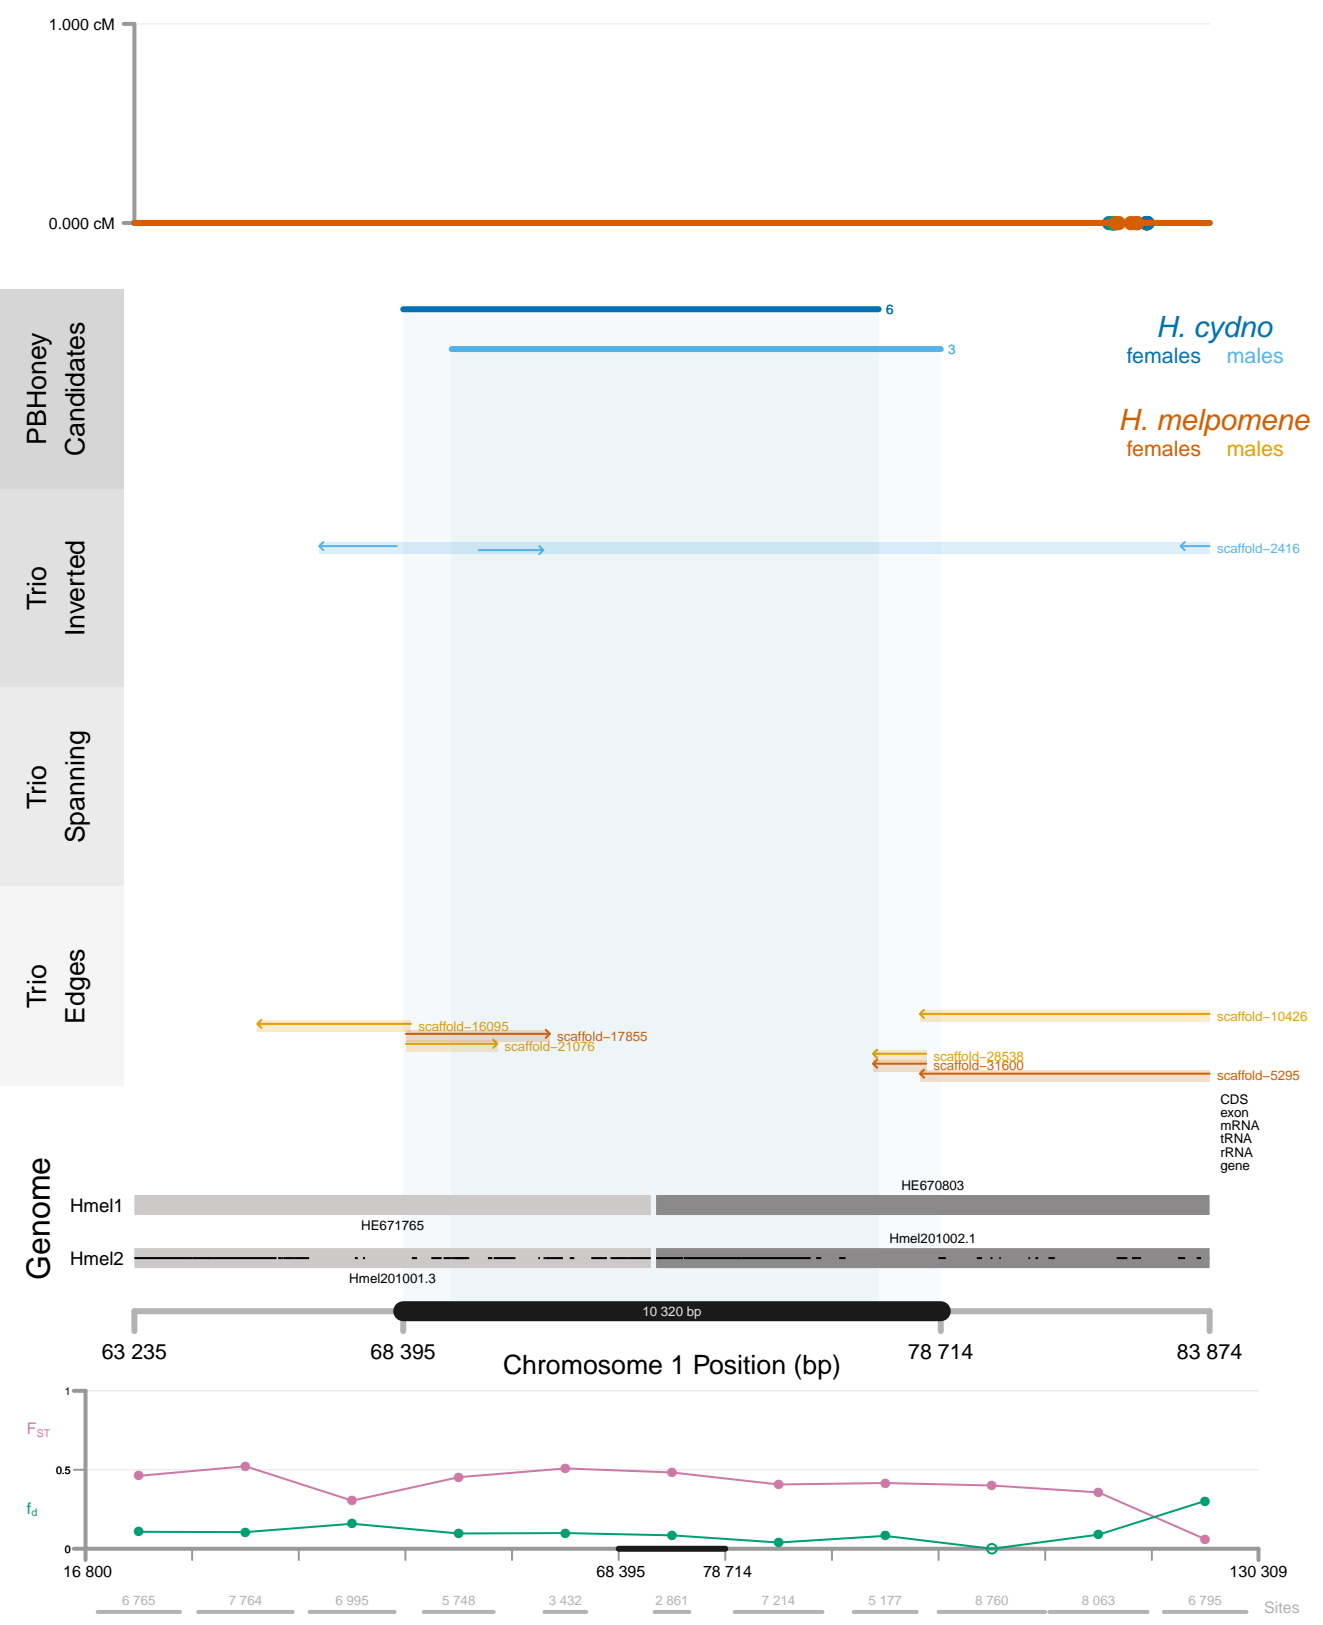

Figure S8.6

*H. cydno*

Split reads and trio assembly

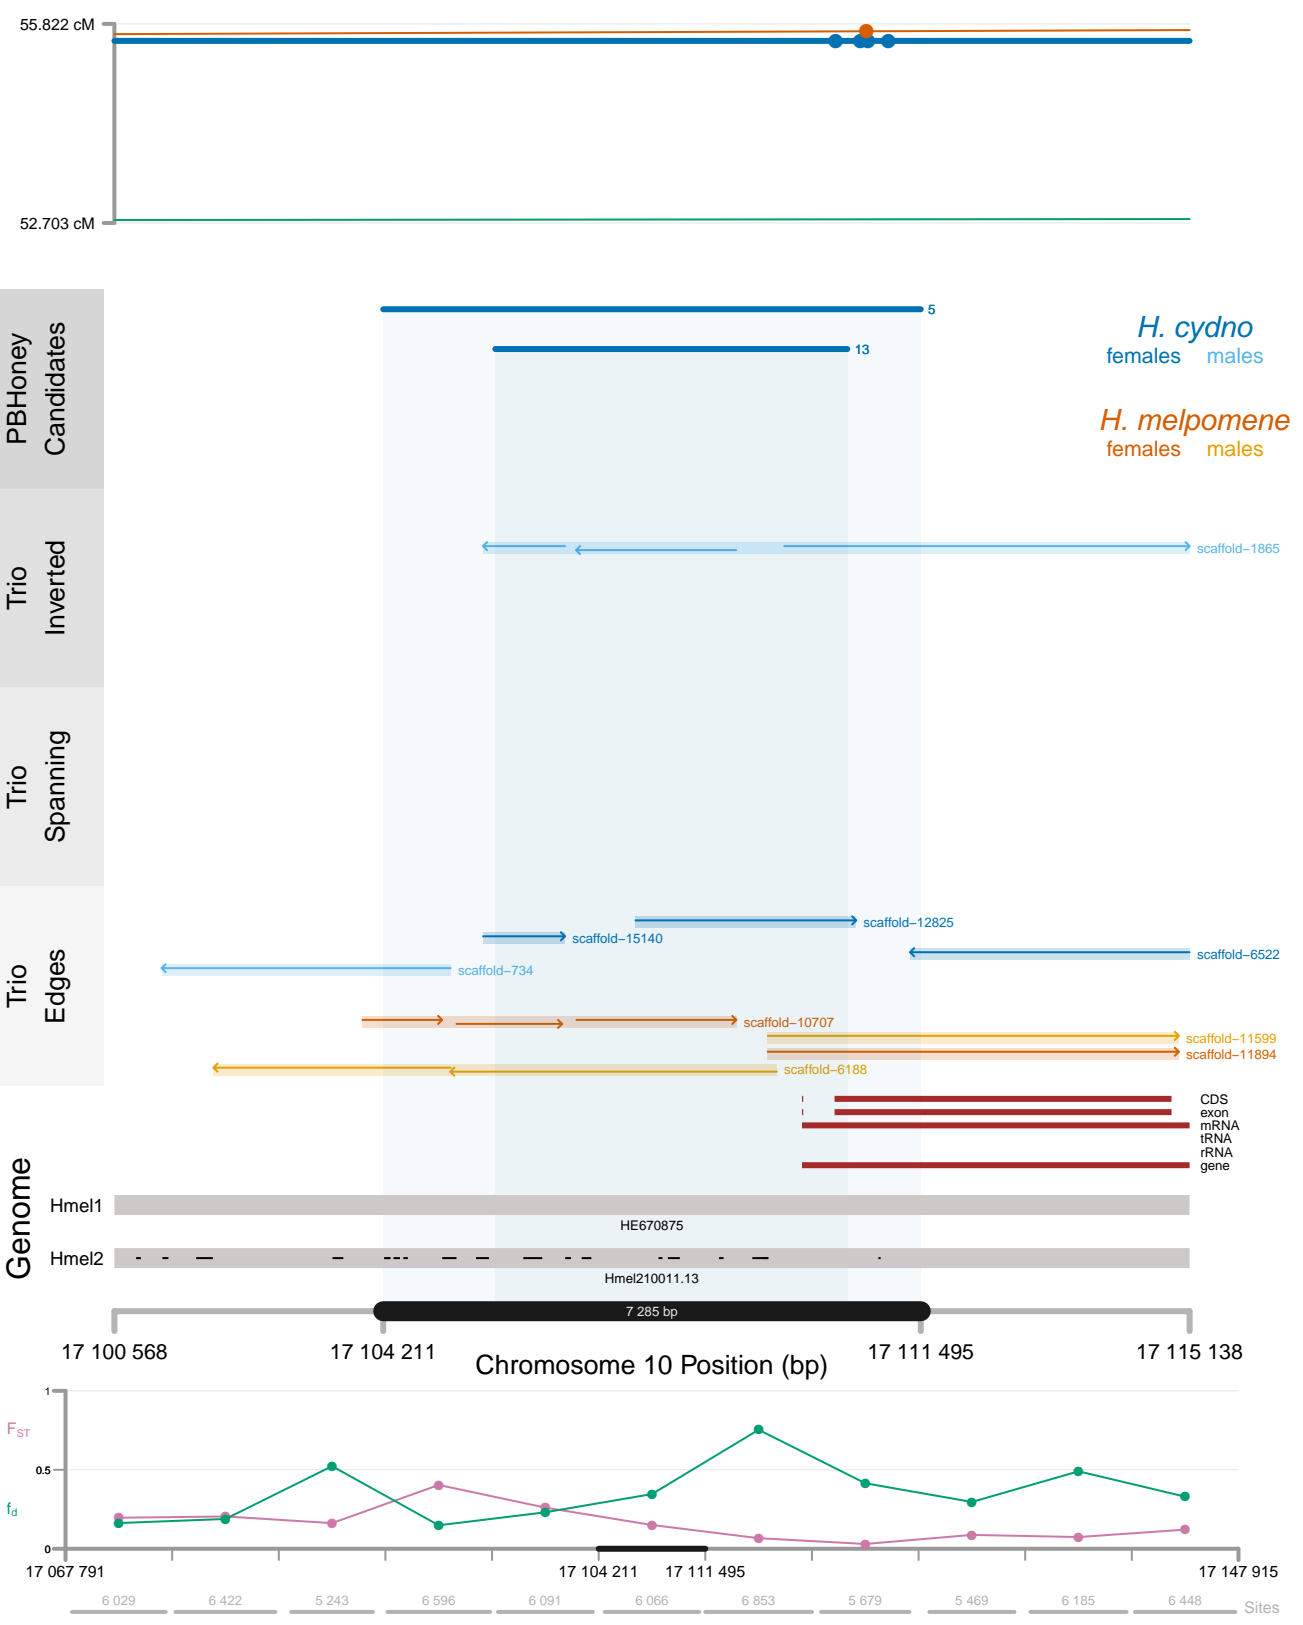

Figure S8.7

*H. cydno*

Split reads and trio assembly

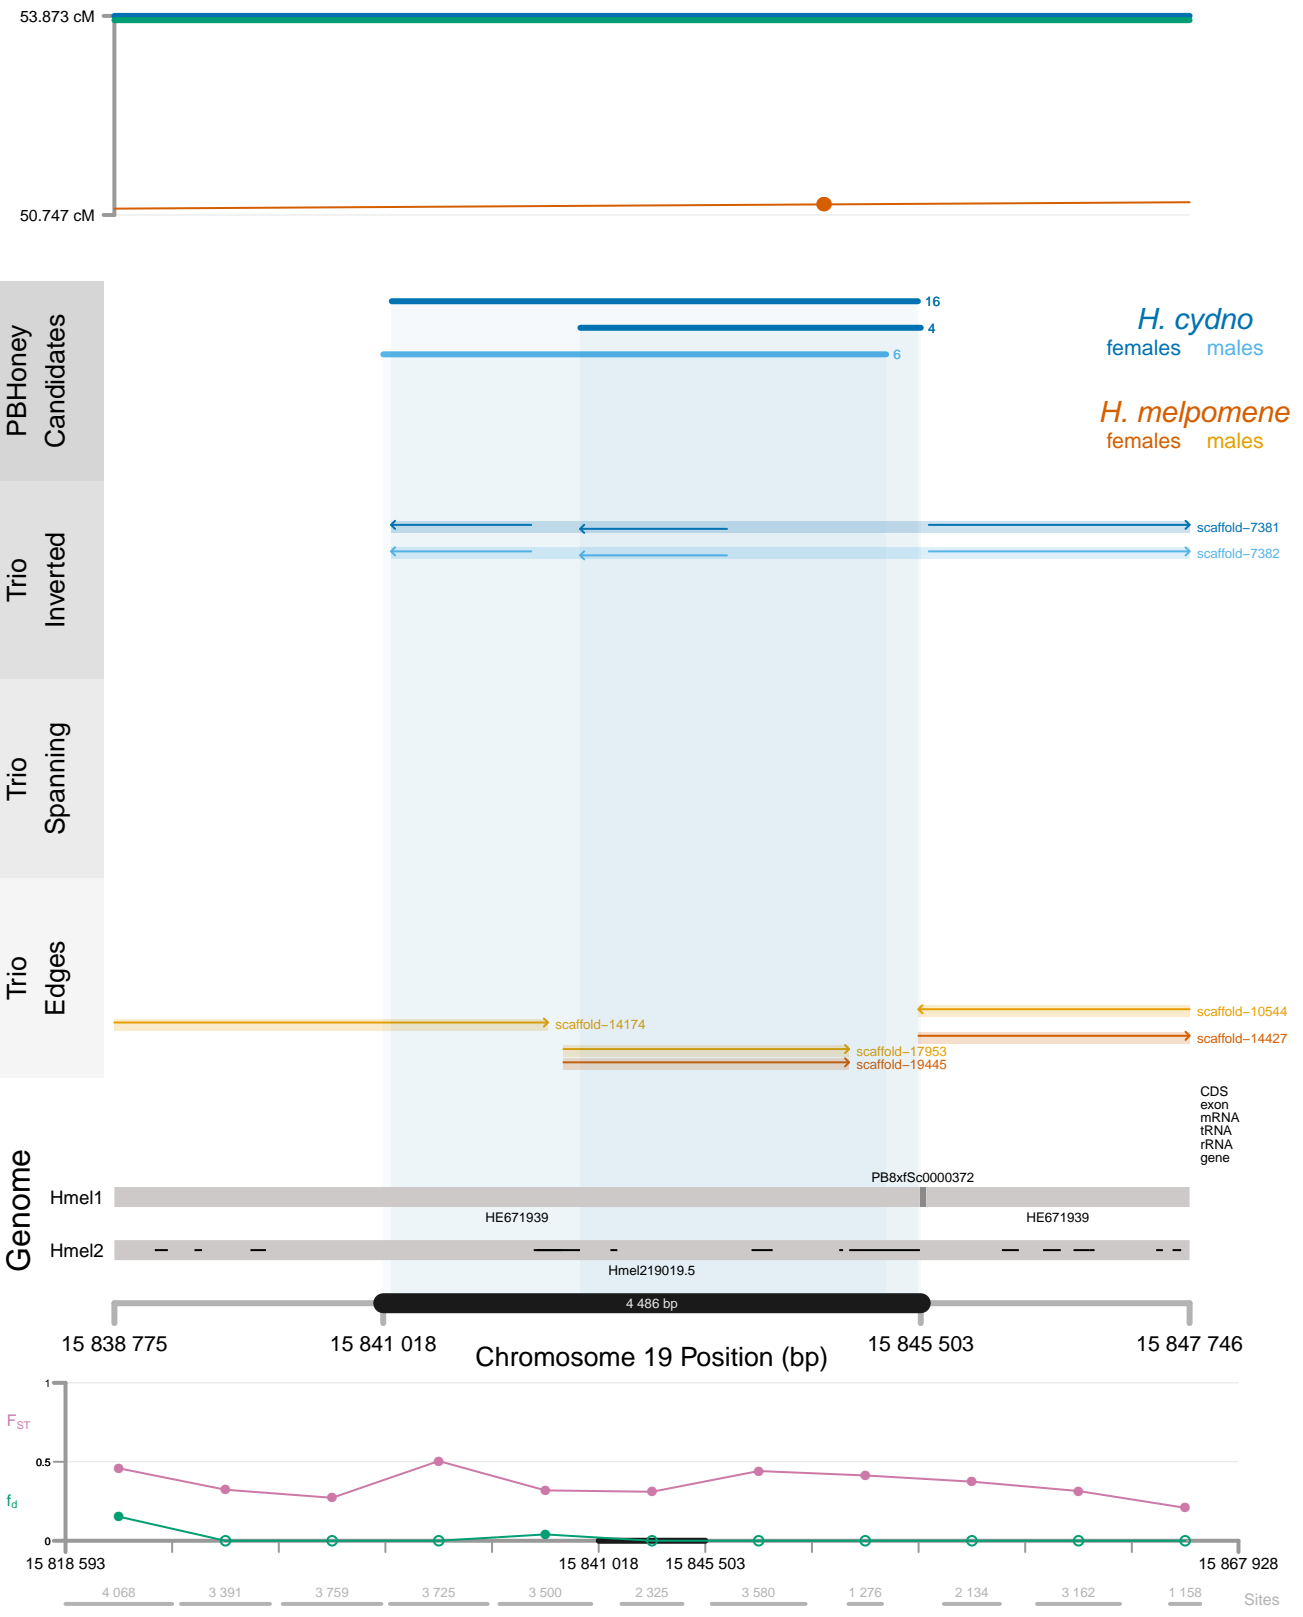

Figure S8.8

*H. cydno*

Split reads and trio assembly

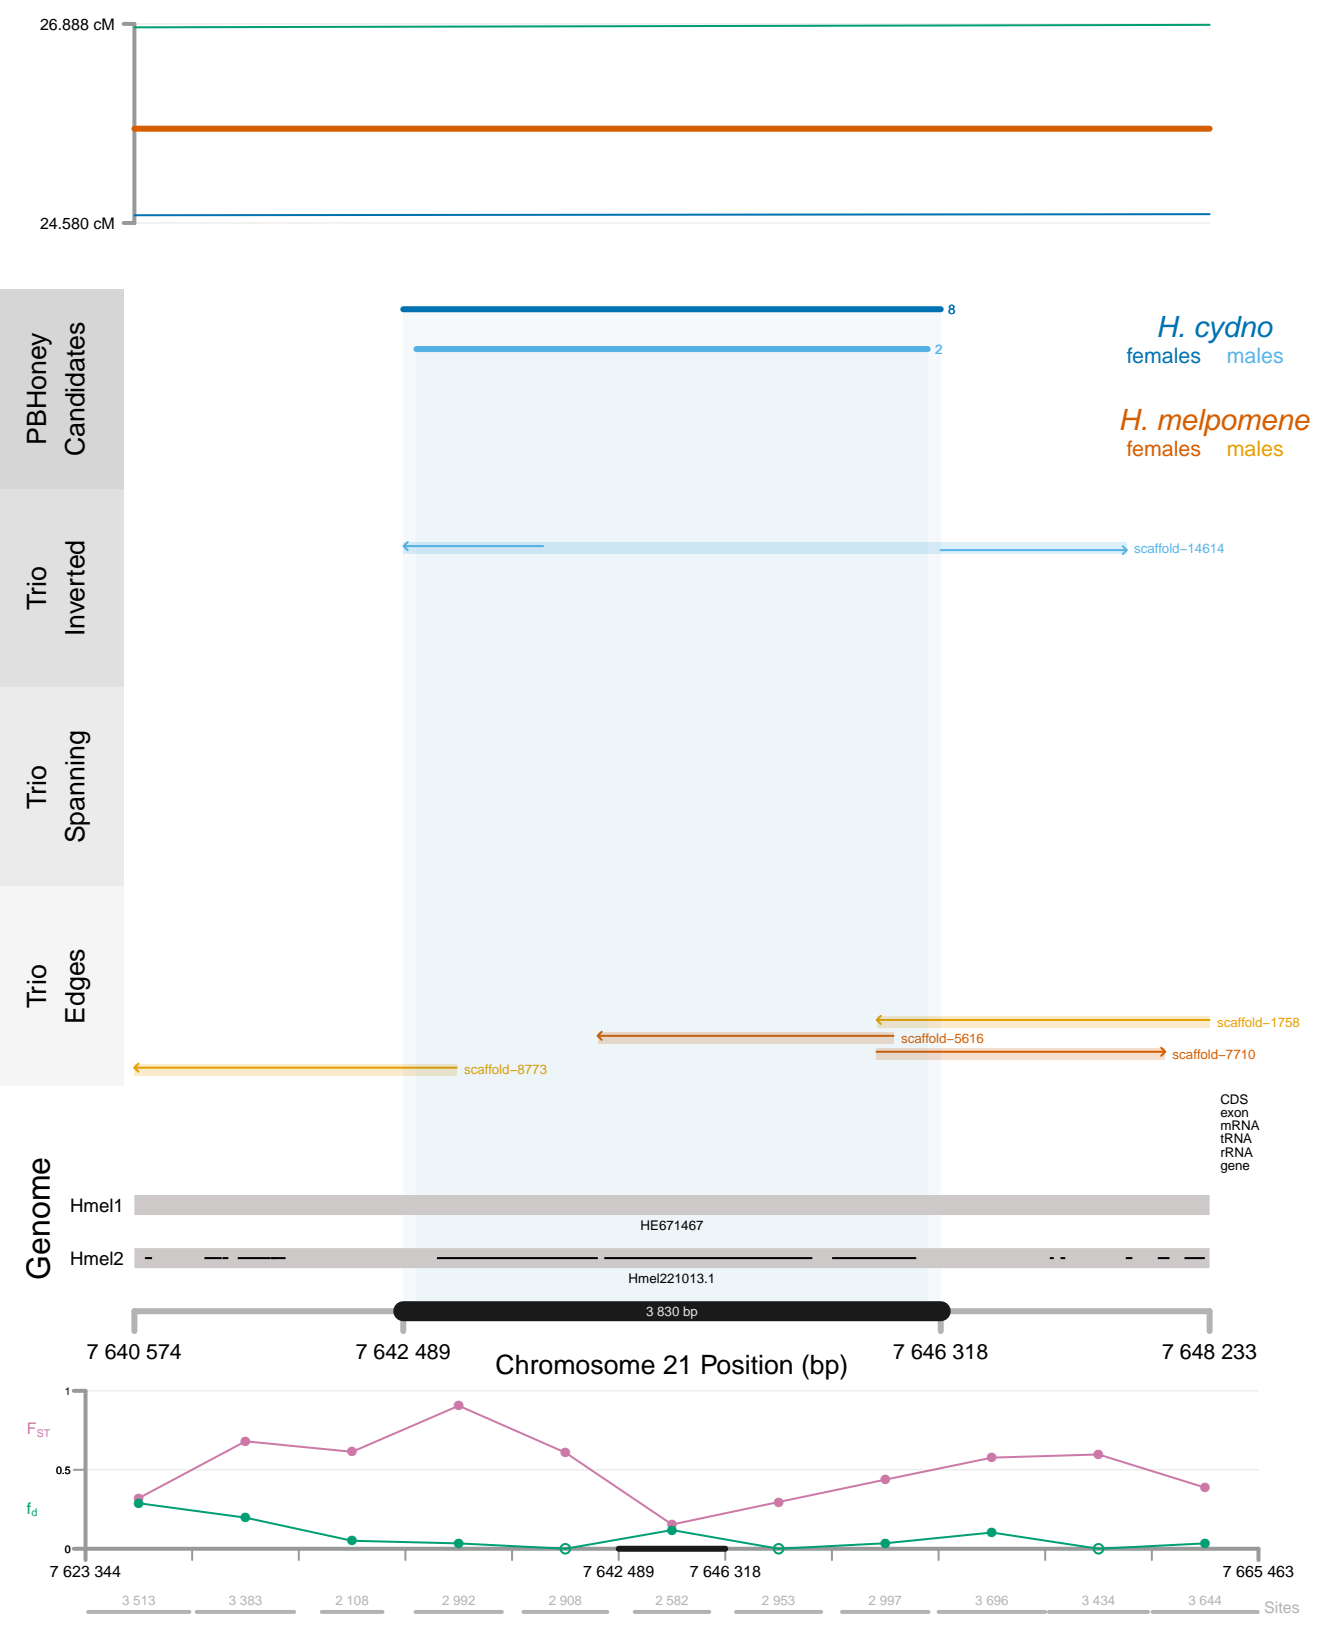



Figure S8.9

*H. cydno*

Split reads and trio assembly

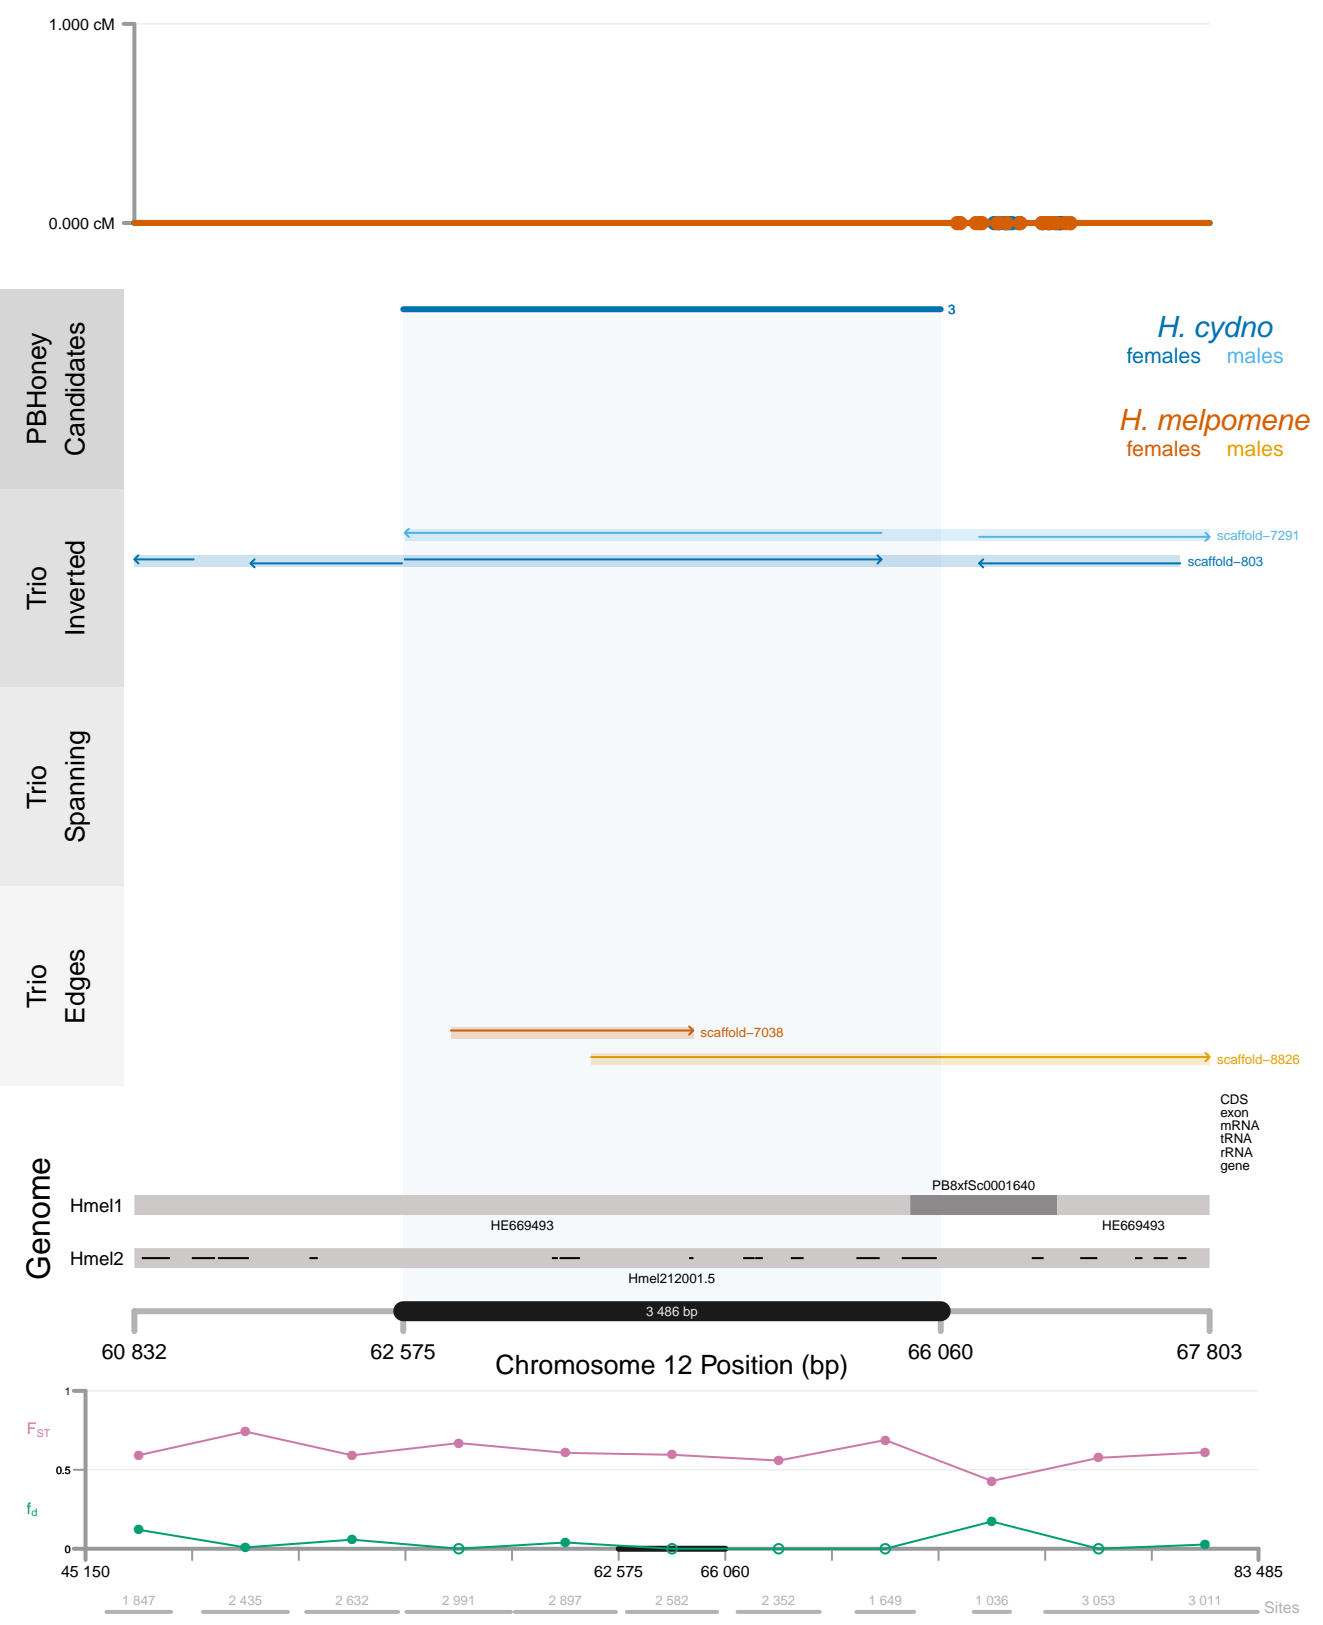

Figure S8.10

*H. cydno*

Split reads and trio assembly

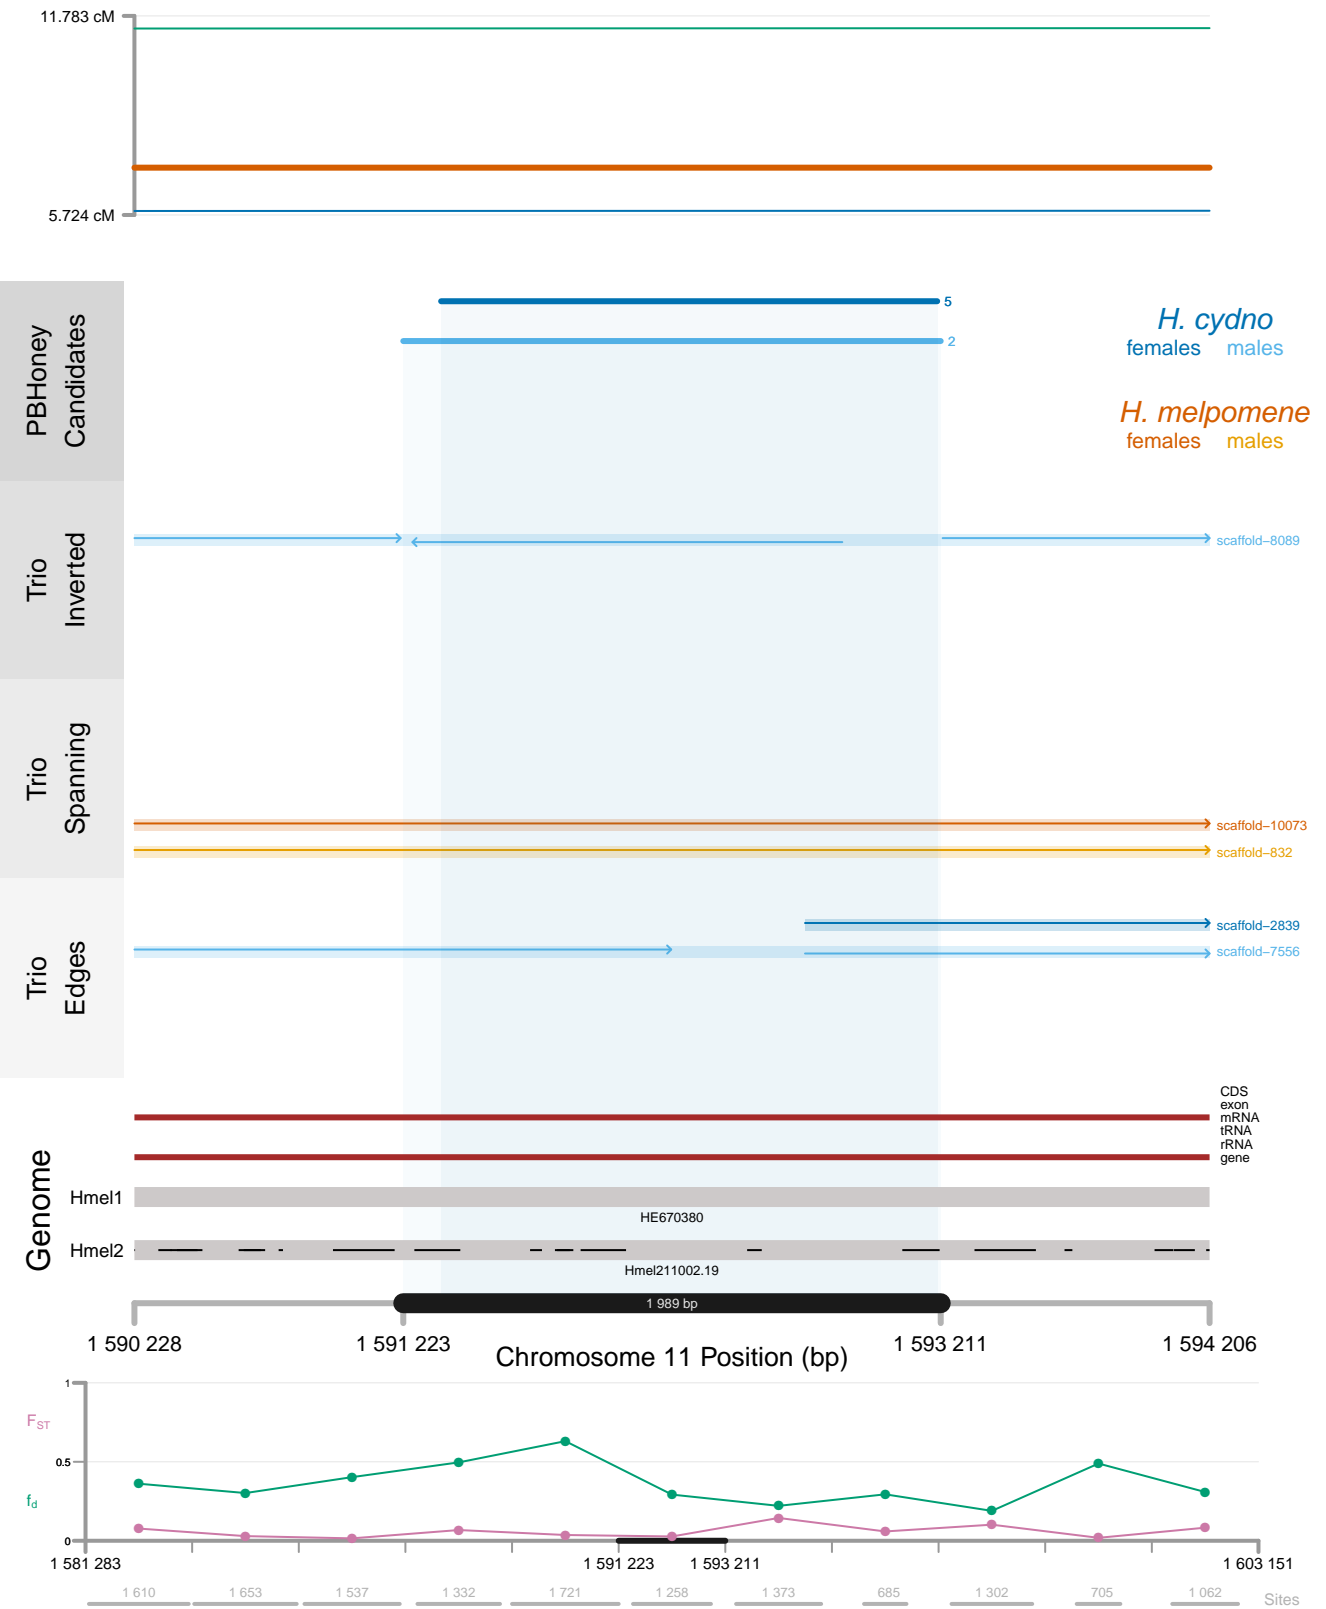

Figure S8.11

*H. cydno*

Split reads and trio assembly

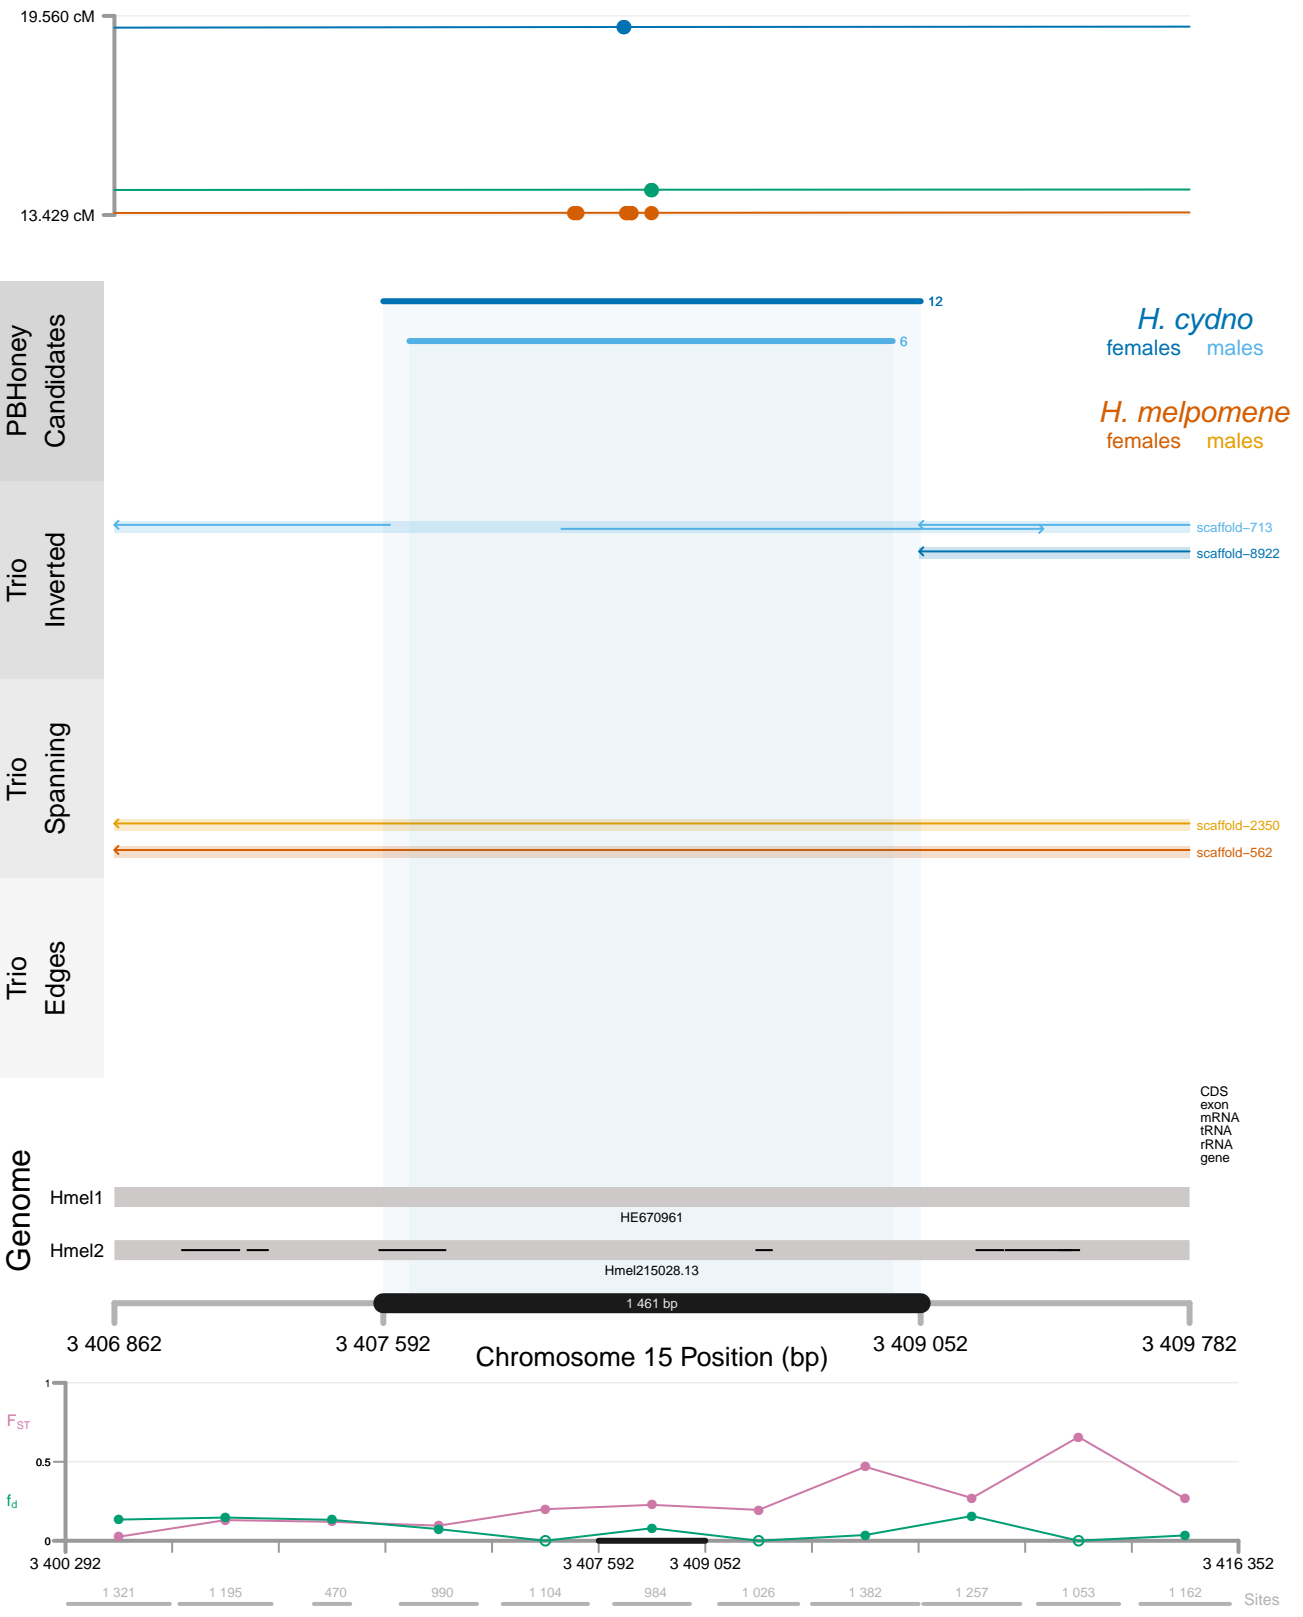

Figure S8.12

*H. cydno*

Split reads and trio assembly

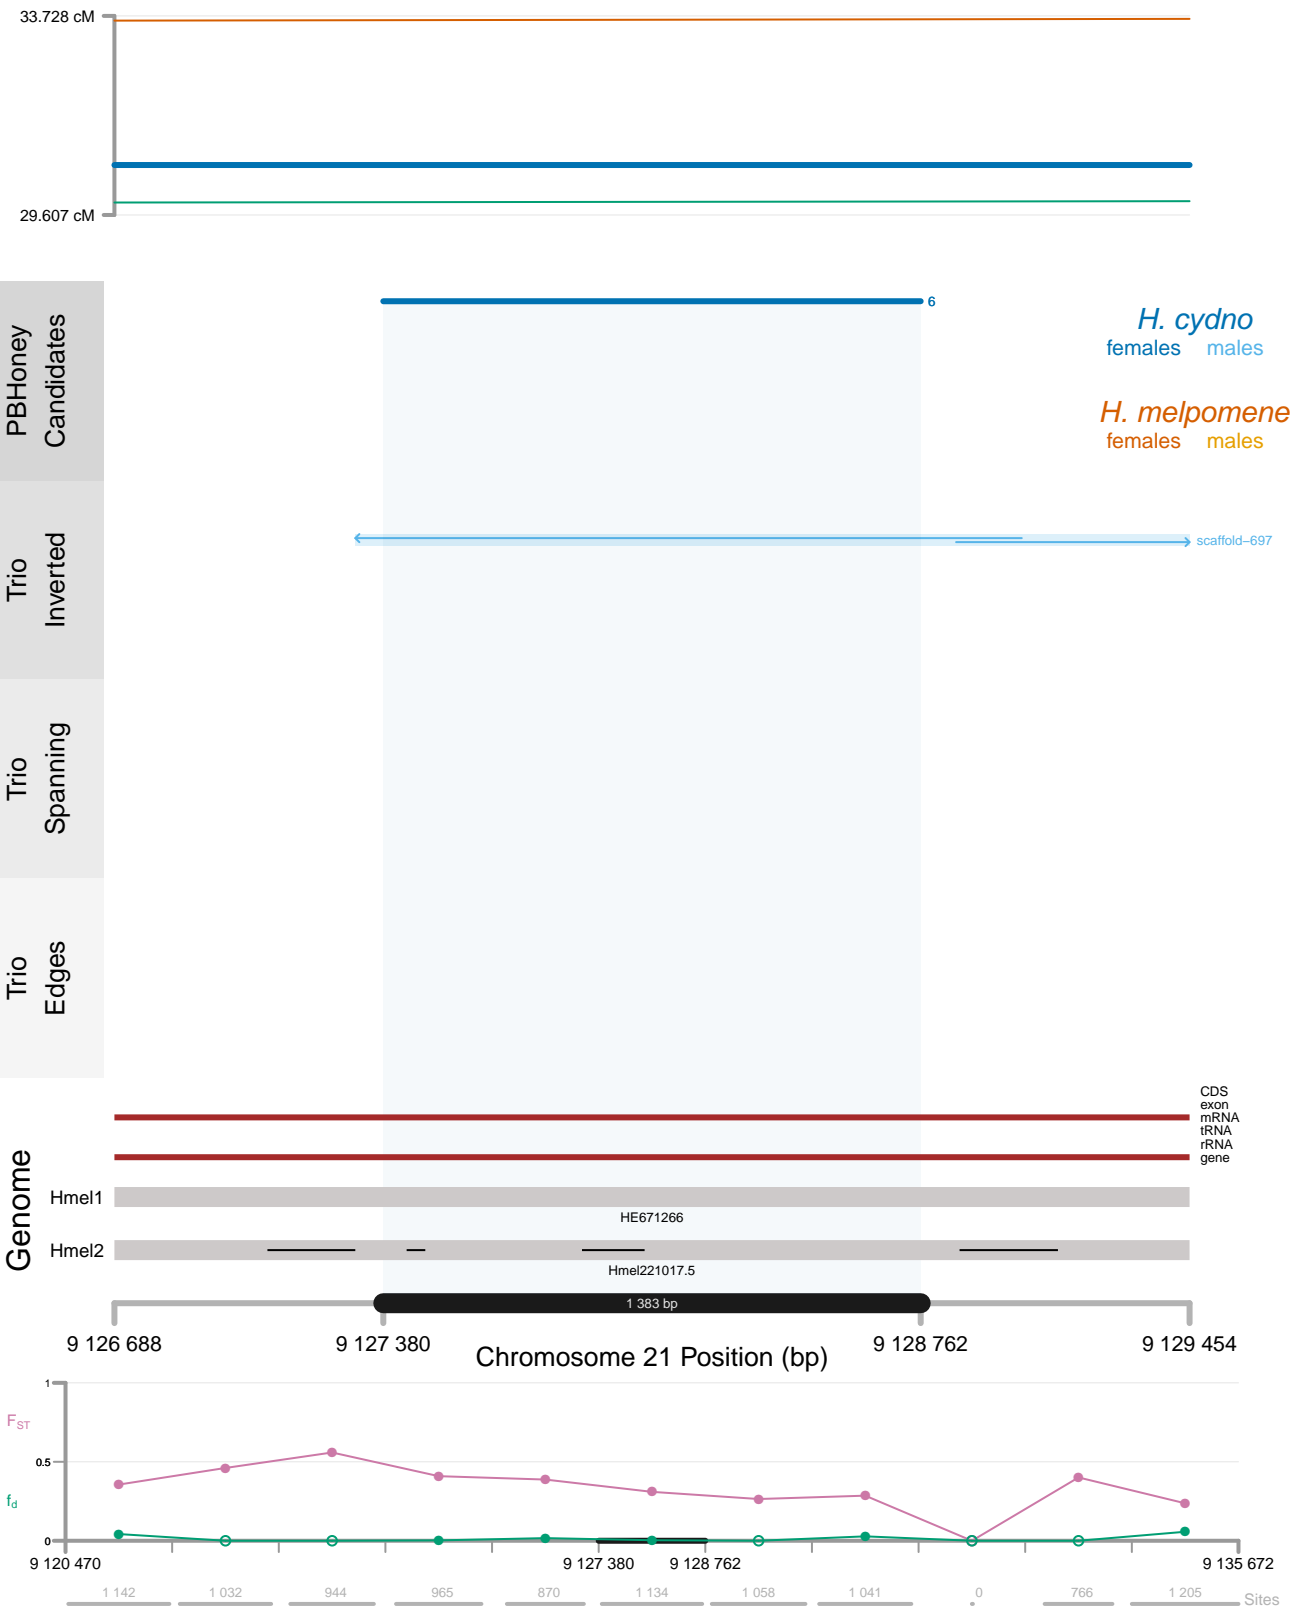

Figure S8.13

*H. cydno*

Split reads and trio assembly

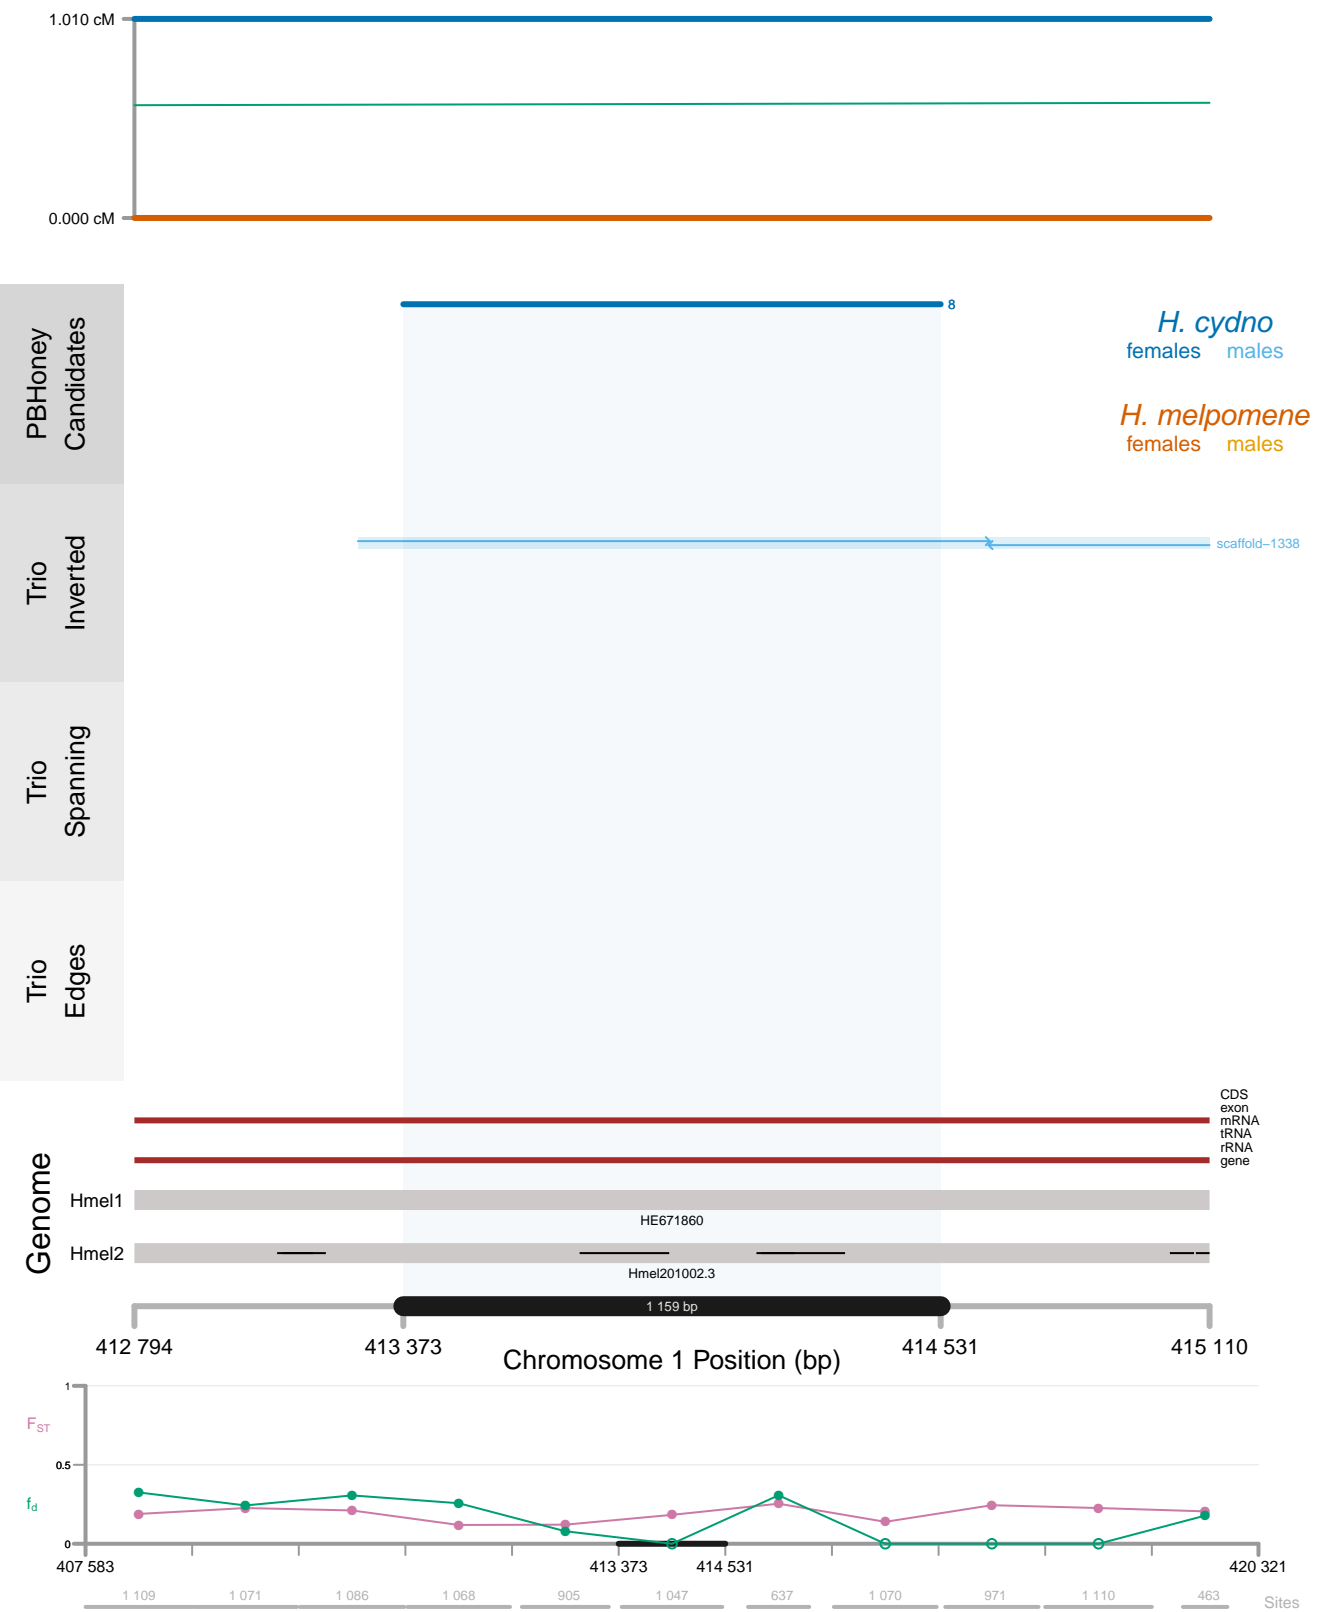

Supplement: Supplementary file [file 083931-8.pdf]
